# Supplementary material for: Elective and Emergency Deep Brain Stimulation in Refractory Pediatric Monogenetic Movement Disorders Presenting with Dystonia: Current Practice Illustrated by Two Cases
Source: PubMed Central journal article supplement — Neuropediatrics. 2022 Dec 27;54(1):44–52. doi: 10.1055/a-1959-9088 (PMC9842449; doi:10.1055/a-1959-9088), 2022-12-27
Supplement: 10-1055-a-1959-9088-s0420223219oa.pdf [file 10-1055-a-1959-9088-s0420223219oa.pdf]

### **Supplementary References, Table 1 (in order of presentation in the table)**

Dy ME, Chang FC, Jesus SD, et al. Treatment of ADCY5-associated dystonia, chorea, and hyperkinetic disorders with deep brain stimulation: a multicenter case series. *J Child Neurol* 2016;31(8):1027–35

Meijer IA, Miravite J, Kopell BH, Lubarr N. Deep brain stimulation in an additional patient with ADCY5-related movement disorder. *J Child Neurol* 2017;32(4):438–39

de Almeida Marcelino AL, Mainka T, Krause P, Poewe W, Ganos C, Kühn AA. Deep brain stimulation reduces (nocturnal) dyskinesia in patients with ADCY5 mutation: a case series. *J Neurol* 2020;267(12):3624–31

### **Supplementary References, Table 2 (in order of presentation in the table)**

Kulkarni N, Tang S, Bhardwaj R, Bernes S, Grebe TA. Progressive movement disorder in brothers carrying a GNAO1 mutation responsive to deep brain stimulation. *J Child Neurol* 2016;31:211–14

Yilmaz S, Turhan T, Ceylaner S, Gökben S, Tekgul H, Serdaroglu G. Excellent response to deep brain stimulation in a young girl with GNAO1-related progressive choreoathetosis. *Childs Nerv Syst* 2016;32:1567–68

Danti FR, Galosi S, Romani M, et al. GNAO1 encephalopathy: broadening the phenotype and evaluating treatment and outcome. *Neurol Genet* 2017;3(2)

Honey CM, Malhotra AK, Tarailo-Graovac M, van Karnebeek CDM, Horvath G, Sulistyanto A. GNAO1 mutation-induced pediatric dystonic storm rescue with pallidal deep brain stimulation. *J Child Neurol* 2018;33:413–16

Benato A, Carecchio M, Burlina A, et al. Long-term effect of subthalamic and pallidal deep brain stimulation for status dystonicus in children with methylmalonic acidemia and GNAO1 mutation. *J Neural Transm* 2019;126:739–57

Yamashita Y, Ogawa T, Ogaki K, et al. Neuroimaging evaluation and successful treatment by using directional deep brain stimulation and levodopa in a patient with GNAO1-associated movement disorder: a case report. *J Neurol Sci* 2020;411:116710

Danhofer P, Zech M, Bálintová Z, Baláž M, Jech R, Ošlejšková H. Brittle biballism–dystonia in a pediatric patient with GNAO1 mutation managed using pallidal deep brain stimulation. *Mov Disord Clin Pract* 2021;8(1):153
